# Supplementary material
Source: publisher figshare collection journal article supplement (https://tandf.figshare.com/articles/dataset/_/1568465)
Supplement: Supplementary file 1 [file 1]

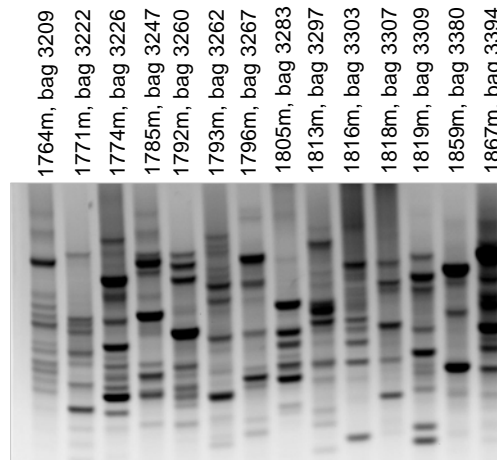

Fig. S2. Comparative ERIC PCR profiles of genomic DNA from 16 NEEM ice core sample used in molecular analyses. Electrophoretic separation of the products was carried out in 1% agarose (AquaPor LE) in Na-borate buffer, pH 8.5 V cm<sup>-1</sup>. Bag numbers and ice core depths are indicated.
