# Supplementary material
Source: publisher figshare collection journal article supplement (https://tandf.figshare.com/articles/dataset/_/1568465)
Supplement: Supplementary file 2 [file 1]

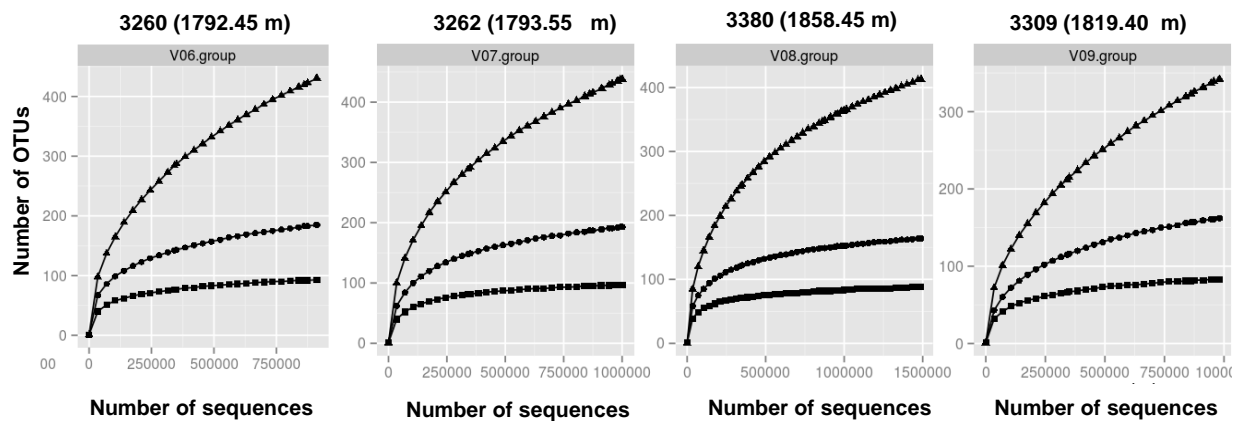

Fig. S3. Rarefaction curves of phylotype based operational taxonomic units (OTUs) of the SSU rRNA gene Illumina sequence reads for NEEM ice core samples from different depths. Phylotype levels include genus – triangles, family – dots, order – rectangles.
