# Supplementary material
Source: publisher figshare collection journal article supplement (https://tandf.figshare.com/articles/dataset/_/1568465)
Supplement: Supplementary file 3 [file 1]

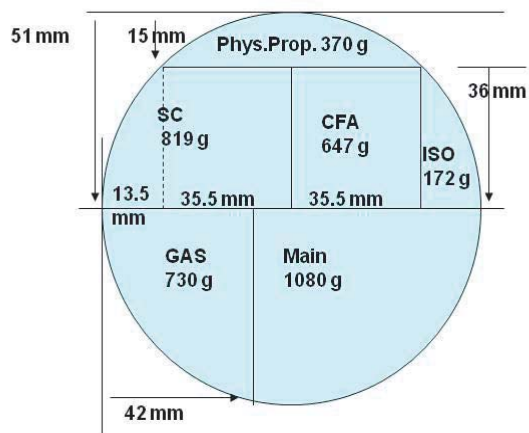

Fig. S1. The NEEM ice core processing scheme showing the horizontal dimensions and the weight of the 55 cm long sub-sections for different analyses: physical properties (Phys. Prop), continuous chemistry (CFA), isotopes analyses (ISO) gas analyses (GAS), main core (Main), Steering Committee (SC).
